# Supplementary material
Source: PubMed Central journal article supplement (PMC3665297)
Supplement: Supp_Figure1.pdf [file Supp_Figure1.pdf]

## Supplementary Data

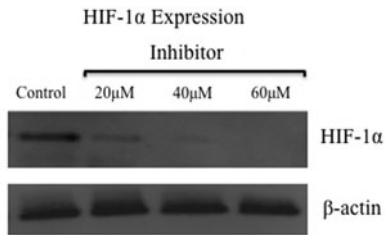

**SUPPLEMENTARY FIG. S1.** Protein expression of hypoxia-inducible factor-1 $\alpha$  (HIF-1 $\alpha$ ) in adipose-derived, mesenchymal stem cells in 2-D culture after 24 h at 1% O<sub>2</sub> with 0, 20, 40, and 60  $\mu$ m inhibitor concentration. A representative gel is shown.
